# Supplementary material for: Performance and usefulness of a novel automated immunoassay HISCL SARS-CoV-2 Antigen assay kit for the diagnosis of COVID-19
Source: PubMed Central journal article supplement (PMC8636628; doi:10.1038/s41598-021-02636-x), 2021-12-01
Supplement: 41598_2021_2636_MOESM1_ESM.pdf [file 41598_2021_2636_MOESM1_ESM.pdf]

## **Supplemental materials**

### **Performance and usefulness of a novel automated immunoassay HISCL SARS-CoV-2**

#### **Antigen assay kit for the diagnosis of COVID-19**

Kaori Saito<sup>1†</sup>, Tomohiko Ai<sup>1†</sup>, Akinori Kawai<sup>2</sup>, Jun Matsui<sup>3</sup>, Yoshiyuki Fukushima<sup>3</sup>, Norihiro Kikukawa<sup>2</sup>, Takuya Kyoutou<sup>4</sup>, Masayoshi Chonan<sup>5</sup>, Takeaki Kawakami<sup>5</sup>, Yoshie Hosaka<sup>5</sup>, Shigeki Misawa<sup>5</sup>, Haruhi Takagi<sup>6</sup>, Yasushi Matsushita<sup>7</sup>, Makoto Hiki<sup>8,9</sup>, Atsushi Okuzawa<sup>10</sup>, Satoshi Hori<sup>6,11</sup>, Toshio Naito<sup>12</sup>, Takashi Miida<sup>1</sup>, Kazuhisa Takahashi<sup>6</sup>, Yoko Tabe<sup>1,13\*</sup>

<sup>1</sup>Department of Clinical Laboratory Medicine, Juntendo University Graduate School of Medicine, Tokyo, Japan

<sup>2</sup>Clinical Innovation, Sysmex Corporation, Kobe, Japan

<sup>3</sup>LS Medical Affairs, Sysmex Corporation, Kobe, Japan

<sup>4</sup>Engineering 1, Sysmex Corporation, Kobe, Japan

<sup>5</sup>Department of Clinical Laboratory, Juntendo University Hospital, Tokyo, Japan

<sup>6</sup>Department of Respiratory Medicine, Juntendo University Graduate School of Medicine, Tokyo, Japan

<sup>7</sup>Department of Internal Medicine and Rheumatology, Juntendo University Graduate School of Medicine, Tokyo, Japan

<sup>8</sup>Emergency and Disaster Medicine, Juntendo University Faculty of Medicine, Tokyo, Japan

<sup>9</sup>Department of Cardiovascular Biology and Medicine, Juntendo University Faculty of Medicine, Tokyo, Japan

<sup>10</sup>Department of Infection Control Science, Juntendo University Graduate School of Medicine, Tokyo, Japan

<sup>11</sup>Department of Coloproctological Surgery, Juntendo University Graduate School of Medicine, Tokyo, Japan

<sup>12</sup>Department of General Medicine, Juntendo University Graduate School of Medicine, Tokyo, Japan

<sup>13</sup>Department of Next Generation Hematology Laboratory Medicine, Juntendo University Graduate School of Medicine, Tokyo, Japan

†These authors equally contributed to the study.

### Supplemental Table 1. Validation dataset

|    | HICL   |            |       | RT-PCR    |
|----|--------|------------|-------|-----------|
|    | Count  | Ag (pg/mL) | COI   | Copy/test |
| 1  | 9124   | 0.7        | 0.2   | 17        |
| 2  | 7431   | <0.00      | 0.0   | 20        |
| 3  | 13287  | 4.7        | 1.3   | 21        |
| 4  | 7718   | <0.00      | 0.0   | 26        |
| 5  | 11041  | 2.5        | 0.7   | 48        |
| 6  | 13905  | 5.3        | 1.5   | 56        |
| 7  | 12794  | 4.2        | 1.2   | 63        |
| 8  | 12709  | 4.2        | 1.1   | 65        |
| 9  | 13905  | 5.3        | 1.5   | 80        |
| 10 | 10782  | 2.3        | 0.6   | 81        |
| 11 | 10073  | 1.6        | 0.4   | 292       |
| 12 | 314223 | 295.8      | 81.1  | 1087      |
| 13 | 254478 | 238.0      | 65.2  | 1499      |
| 14 | 485100 | 461.1      | 126.3 | 1998      |
| 15 | 151518 | 138.4      | 37.9  | 2077      |

|    |           |          |         |          |
|----|-----------|----------|---------|----------|
| 16 | 92006     | 80.9     | 22.2    | 4367     |
| 17 | 102314    | 90.8     | 24.9    | 13196    |
| 18 | 433187    | 410.9    | 112.6   | 13291    |
| 19 | 2715600   | 2618.9   | 717.5   | 27682    |
| 20 | 195055    | 180.6    | 49.5    | 47208    |
| 21 | 380159    | 359.6    | 98.5    | 81391    |
| 22 | 803453    | 769.1    | 210.7   | 115743   |
| 23 | 2796673   | 2697.3   | 739.0   | 618395   |
| 24 | 35994811  | 34812.4  | 9537.6  | 1121785  |
| 25 | 17744166  | 17157.1  | 4700.6  | 1246365  |
| 26 | 16745726  | 16191.3  | 4436.0  | 1680481  |
| 27 | 40782409  | 39443.8  | 10806.5 | 4369413  |
| 28 | 97282701  | 94100.8  | 25781.1 | 8277600  |
| 29 | 155335619 | 150259.8 | 41167.1 | 15067576 |
| 30 | 153011627 | 148011.7 | 40551.1 | 45134920 |
| 31 | 8651      | 0.2      | 0.1     | 0        |
| 32 | 8065      | 0.0      | 0.0     | 0        |
| 33 | 8167      | 0.0      | 0.0     | 0        |
| 34 | 7825      | 0.0      | 0.0     | 0        |
| 35 | 8110      | 0.0      | 0.0     | 0        |
| 36 | 8221      | 0.0      | 0.0     | 0        |
| 37 | 7286      | 0.0      | 0.0     | 0        |
| 38 | 6632      | 0.0      | 0.0     | 0        |
| 39 | 7773      | 0.6      | 0.2     | 0        |
| 40 | 8632      | 1.5      | 0.4     | 0        |
| 41 | 6816      | 0.0      | 0.0     | 0        |
| 42 | 4662      | 0.0      | 0.0     | 0        |
| 43 | 9998      | 3.1      | 0.8     | 0        |

|    |       |     |     |   |
|----|-------|-----|-----|---|
| 44 | 9761  | 2.8 | 0.8 | 0 |
| 45 | 9657  | 2.7 | 0.7 | 0 |
| 46 | 9714  | 2.8 | 0.8 | 0 |
| 47 | 9502  | 2.5 | 0.7 | 0 |
| 48 | 9423  | 2.4 | 0.7 | 0 |
| 49 | 7238  | 0.0 | 0.0 | 0 |
| 50 | 8864  | 1.8 | 0.5 | 0 |
| 51 | 7866  | 0.7 | 0.2 | 0 |
| 52 | 9122  | 2.1 | 0.6 | 0 |
| 53 | 13174 | 6.7 | 1.8 | 0 |
| 54 | 6715  | 0.0 | 0.0 | 0 |
| 55 | 8749  | 1.6 | 0.4 | 0 |
| 56 | 8820  | 1.7 | 0.5 | 0 |
| 57 | 8138  | 0.9 | 0.2 | 0 |
| 58 | 8782  | 1.6 | 0.4 | 0 |
| 59 | 8346  | 1.1 | 0.3 | 0 |
| 60 | 8781  | 1.6 | 0.4 | 0 |
| 61 | 8506  | 1.3 | 0.4 | 0 |
| 62 | 8588  | 1.4 | 0.4 | 0 |
| 63 | 8666  | 1.5 | 0.4 | 0 |
| 64 | 8490  | 1.3 | 0.4 | 0 |
| 65 | 8075  | 0.8 | 0.2 | 0 |
| 66 | 8506  | 1.3 | 0.4 | 0 |
| 67 | 7785  | 0.5 | 0.1 | 0 |
| 68 | 8209  | 1.0 | 0.3 | 0 |
| 69 | 8555  | 1.4 | 0.4 | 0 |
| 70 | 7975  | 0.7 | 0.2 | 0 |
| 71 | 8625  | 1.5 | 0.4 | 0 |

|    |      |     |     |   |
|----|------|-----|-----|---|
| 72 | 8221 | 1.0 | 0.3 | 0 |
| 73 | 8570 | 1.4 | 0.4 | 0 |
| 74 | 8427 | 1.2 | 0.3 | 0 |
| 75 | 8011 | 0.8 | 0.2 | 0 |
| 76 | 8758 | 1.6 | 0.4 | 0 |
| 77 | 8298 | 1.1 | 0.3 | 0 |
| 78 | 8546 | 1.4 | 0.4 | 0 |
| 79 | 8287 | 1.1 | 0.3 | 0 |
| 80 | 8308 | 1.1 | 0.3 | 0 |
| 81 | 7898 | 0.6 | 0.2 | 0 |
| 82 | 7771 | 0.5 | 0.1 | 0 |
| 83 | 8727 | 1.6 | 0.4 | 0 |
| 84 | 8606 | 1.4 | 0.4 | 0 |

**Supplemental Table 2. Test Dataset**

| <b>ID</b> | <b>Copy numbers</b> | <b>Ct</b> | <b>COI</b> | <b>Day</b> | <b>Severity</b> |
|-----------|---------------------|-----------|------------|------------|-----------------|
| Cov-00102 | 133789              | 23.43     | 398.8      | 0          | mild            |
| Cov-00120 | 10                  | 36.22     | 39.8       | 0          | mild            |
| Cov-03394 | 12025642            | 17.78     | 38233.6    | 1          | mild            |
| Cov-05261 | 1760925             | 20.6      | 29609.9    | 1          | mild            |
| Cov-03406 | 19019181            | 16.3      | 5763.6     | 2          | mild            |
| Cov-00043 | 158651              | 23.15     | 998.2      | 3          | mild            |
| Cov-00041 | 79628               | 22.82     | 1617.3     | 4          | mild            |
| Cov-00134 | 922                 | 30.49     | 13.4       | 4          | mild            |
| Cov-00061 | 789139              | 20.59     | 3211.2     | 5          | mild            |
| Cov-04117 | 8799                | 28        | 262.2      | 5          | mild            |
| Cov-00035 | 469                 | 31.5      | 112.9      | 5          | mild            |
| Cov-00059 | 305                 | 31.11     | 22.8       | 5          | mild            |
| Cov-00039 | 49                  | 33.87     | <1.0       | 5          | mild            |
| Cov-00034 | 1060                | 29.23     | 29.2       | 6          | mild            |
| Cov-00098 | 7                   | 37.9      | 8.9        | 6          | mild            |

|           |         |       |        |     |          |
|-----------|---------|-------|--------|-----|----------|
| Cov-00068 | 2       | 39.41 | <1.0   | 6   | mild     |
| Cov-04049 | 258     | 32.41 | <1.0   | 8   | mild     |
| Cov-00249 | 2300950 | 19.31 | 6449.6 | 9   | mild     |
| Cov-00062 | 2       | 38.68 | 18.6   | 9   | mild     |
| Cov-00931 | 4       | 37.74 | <1.0   | 17  | mild     |
| Cov-00463 | 3       | 38.25 | <1.0   | 18  | mild     |
| Cov-00428 | 2       | 38.84 | <1.0   | 21  | mild     |
| Cov-00513 | 22      | 35.06 | <1.0   | 22  | mild     |
| Cov-00462 | 2       | 38.57 | <1.0   | 22  | mild     |
| Cov-00442 | 2       | 38.89 | <1.0   | 22  | mild     |
| Cov-00402 | 17      | 35.52 | <1.0   | 25  | mild     |
| Cov-03461 | 4       | 37.89 | <1.0   | 25  | mild     |
| Cov-04948 | 1       | 39.97 | <1.0   | 25  | mild     |
| Cov-04946 | 14      | 36.76 | <1.0   | 27  | mild     |
| Cov-00545 | 2       | 38.57 | <1.0   | 35  | mild     |
| Cov-03196 | 605040  | 21.74 | 1329.1 | N/A | mild     |
| Cov-03889 | 58992   | 24.23 | 797.5  | N/A | mild     |
| Cov-02364 | 75      | 34.26 | <1.0   | N/A | mild     |
| Cov-00205 | 1       | 40.34 | <1.0   | N/A | mild     |
| Cov-00073 | 812321  | 20.4  | 8056   | 0   | moderate |
| Cov-00183 | 423     | 30.62 | 2.8    | 0   | severe   |
| Cov-00148 | 226409  | 22.74 | 1241.3 | 4   | moderate |
| Cov-00091 | 140     | 32.29 | 5.5    | 5   | critical |
| Cov-00227 | 118554  | 22.83 | 233.9  | 7   | moderate |
| Cov-00733 | 20      | 35.26 | <1.0   | 8   | moderate |
| Cov-00142 | 2583175 | 19.02 | 6328.7 | 13  | moderate |
| Cov-00404 | 52      | 33.78 | <1.0   | 14  | moderate |
| Cov-00497 | 1       | 40.03 | 2.6    | 20  | severe   |
| Cov-00443 | 2       | 39.15 | <1.0   | 21  | moderate |
| Cov-00364 | 1       | 39.74 | <1.0   | 23  | moderate |
| Cov-00444 | 2       | 38.78 | <1.0   | 28  | moderate |
| Cov-00514 | -       | -     | <1.0   | 33  |          |
| Cov-00515 | -       | -     | <1.0   | 26  |          |
| Cov-00506 | -       | -     | <1.0   | 0   |          |
| Cov-00308 | -       | -     | <1.0   | N/A |          |
| Cov-00481 | -       | -     | <1.0   | 30  |          |
| Cov-00479 | -       | -     | <1.0   | 23  |          |
| Cov-00535 | -       | -     | <1.0   | 28  |          |
| Cov-00406 | -       | -     | <1.0   | 19  |          |
| Cov-00492 | -       | -     | <1.0   | 23  |          |
| Cov-01441 | -       | -     | <1.0   | 2   |          |

|           |   |   |      |     |  |
|-----------|---|---|------|-----|--|
| Cov-01433 | - | - | <1.0 | N/A |  |
| Cov-01448 | - | - | <1.0 | N/A |  |
| Cov-01419 | - | - | <1.0 | N/A |  |
| Cov-01447 | - | - | <1.0 | N/A |  |
| Cov-01434 | - | - | <1.0 | N/A |  |
| Cov-01417 | - | - | <1.0 | N/A |  |
| Cov-01444 | - | - | <1.0 | N/A |  |
| Cov-01460 | - | - | <1.0 | 1   |  |
| Cov-01456 | - | - | <1.0 | N/A |  |
| Cov-01464 | - | - | <1.0 | N/A |  |
| Cov-01416 | - | - | <1.0 | N/A |  |
| Cov-01424 | - | - | <1.0 | N/A |  |
| Cov-01453 | - | - | <1.0 | N/A |  |
| Cov-01466 | - | - | <1.0 | N/A |  |
| Cov-01463 | - | - | <1.0 | 4   |  |
| Cov-01467 | - | - | <1.0 | 9   |  |
| Cov-01446 | - | - | <1.0 | N/A |  |
| Cov-01455 | - | - | <1.0 | N/A |  |
| Cov-01445 | - | - | <1.0 | 3   |  |
| Cov-01421 | - | - | <1.0 | N/A |  |
| Cov-01439 | - | - | <1.0 | 1   |  |
| Cov-01450 | - | - | <1.0 | N/A |  |
| Cov-01411 | - | - | <1.0 | N/A |  |
| Cov-01458 | - | - | <1.0 | N/A |  |
| Cov-01408 | - | - | <1.0 | N/A |  |
| Cov-01461 | - | - | <1.0 | 5   |  |
| Cov-01429 | - | - | <1.0 | N/A |  |
| Cov-01462 | - | - | <1.0 | 1   |  |
| Cov-01425 | - | - | <1.0 | N/A |  |
| Cov-01437 | - | - | <1.0 | 2   |  |
| Cov-01418 | - | - | <1.0 | N/A |  |
| Cov-01430 | - | - | <1.0 | N/A |  |
| Cov-01435 | - | - | <1.0 | 1   |  |
| Cov-01409 | - | - | <1.0 | 0   |  |
| Cov-01412 | - | - | <1.0 | 2   |  |
| Cov-01459 | - | - | <1.0 | N/A |  |
| Cov-01420 | - | - | <1.0 | N/A |  |
| Cov-01427 | - | - | <1.0 | N/A |  |
| Cov-01443 | - | - | <1.0 | 1   |  |
| Cov-01454 | - | - | <1.0 | N/A |  |
| Cov-01426 | - | - | <1.0 | N/A |  |

|           |   |   |      |     |  |
|-----------|---|---|------|-----|--|
| Cov-01451 | - | - | <1.0 | N/A |  |
| Cov-01413 | - | - | <1.0 | 6   |  |
| Cov-01423 | - | - | <1.0 | N/A |  |
| Cov-01410 | - | - | <1.0 | N/A |  |
| Cov-01414 | - | - | <1.0 | 3   |  |
| Cov-01428 | - | - | <1.0 | N/A |  |
| Cov-01431 | - | - | <1.0 | N/A |  |
| Cov-01422 | - | - | <1.0 | N/A |  |
| Cov-01432 | - | - | <1.0 | N/A |  |
| Cov-01415 | - | - | <1.0 | 0   |  |
| Cov-01449 | - | - | <1.0 | N/A |  |
| Cov-01438 | - | - | <1.0 | N/A |  |
| Cov-01436 | - | - | <1.0 | N/A |  |
| Cov-01440 | - | - | <1.0 | 2   |  |
| Cov-01465 | - | - | <1.0 | 0   |  |
| Cov-01457 | - | - | <1.0 | N/A |  |
| Cov-01452 | - | - | <1.0 | N/A |  |
| Cov-01442 | - | - | <1.0 | 0   |  |



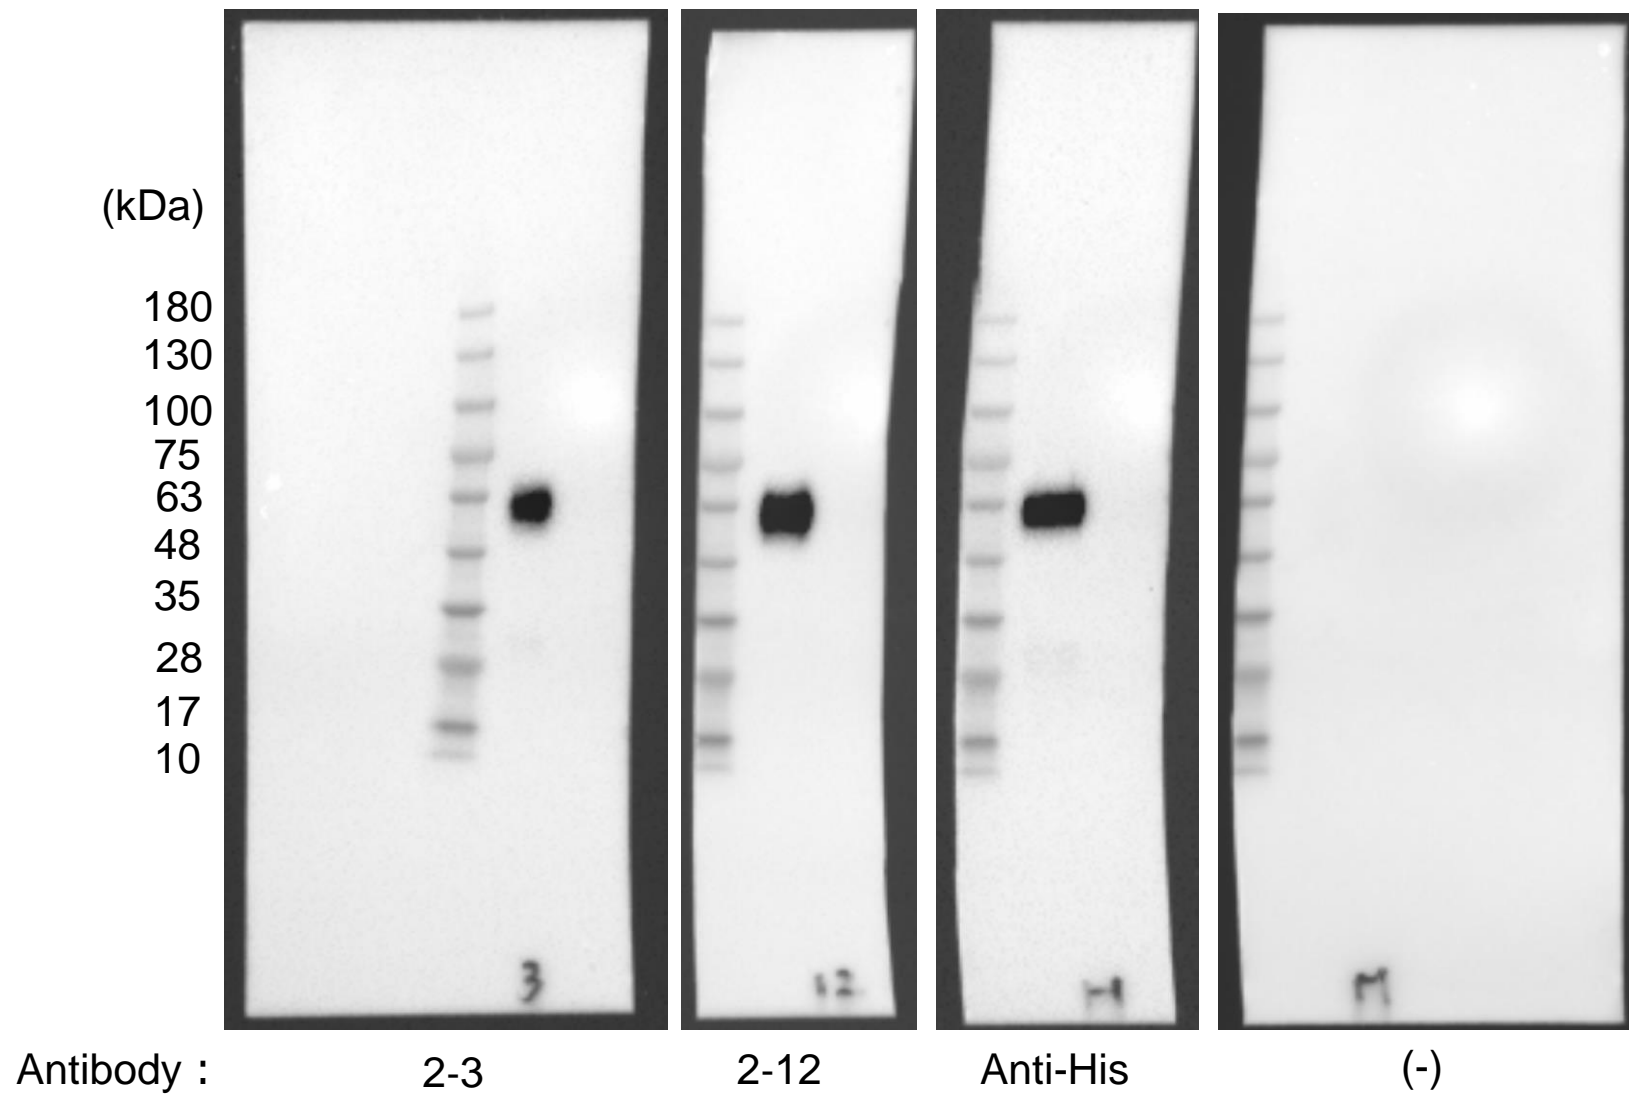

**Supplemental Figure 1.** The original picture of the western blot results before crop.
